RESEARCH ARTICLE

# Sexual Orientation Related Differences in Cortical Thickness in Male Individuals

Christoph Abé<sup>1\*</sup>, Emilia Johansson<sup>1</sup>, Elin Allzén<sup>2</sup>, Ivanka Savic<sup>3</sup>

1. Department of Clinical Neuroscience, Karolinska Institutet, Stockholm, Sweden, 2. Department of Neuroscience, Karolinska Institutet, Stockholm, Sweden, 3. Department of Women's and Children's Health, Division of Pediatric Neurology, Neurology Clinic, Karolinska Hospital, Stockholm, Sweden

\*[christoph.abe@ki.se](mailto:christoph.abe@ki.se)

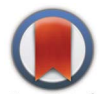

CrossMark  
click for updates

 OPEN ACCESS

**Citation:** Abé C, Johansson E, Allzén E, Savic I (2014) Sexual Orientation Related Differences in Cortical Thickness in Male Individuals. PLoS ONE 9(12): e114721. doi:10.1371/journal.pone.0114721

**Editor:** Antonella Gasbarri, University of L'Aquila, Italy

**Received:** March 20, 2014

**Accepted:** October 24, 2014

**Published:** December 5, 2014

**Copyright:** © 2014 Abé et al. This is an open-access article distributed under the terms of the [Creative Commons Attribution License](https://creativecommons.org/licenses/by/4.0/), which permits unrestricted use, distribution, and reproduction in any medium, provided the original author and source are credited.

**Data Availability:** The authors confirm that all data underlying the findings are fully available without restriction. All relevant data are within the paper and its Supporting Information files.

**Funding:** This work was supported by the Swedish Medical Research Council, Stockholm Brain Institutet, KI (Karolinska Institutet) foundation and by the use of resources and facilities at the Karolinska Institutet, Stockholm. Collection of control data was funded by the AFA insurance fund and the FORTE research fund. The funders had no role in study design, data collection and analysis, decision to publish, or preparation of the manuscript.

**Competing Interests:** The authors have declared that no competing interests exist.

## Abstract

Previous neuroimaging studies demonstrated sex and also sexual orientation related structural and functional differences in the human brain. Genetic information and effects of sex hormones are assumed to contribute to the male/female differentiation of the brain, and similar effects could play a role in processes influencing human's sexual orientation. However, questions about the origin and development of a person's sexual orientation remain unanswered, and research on sexual orientation related neurobiological characteristics is still very limited. To contribute to a better understanding of the neurobiology of sexual orientation, we used magnetic resonance imaging (MRI) in order to compare regional cortical thickness (Cth) and subcortical volumes of homosexual men (hoM), heterosexual men (heM) and heterosexual women (heW). hoM (and heW) had thinner cortices primarily in visual areas and smaller thalamus volumes than heM, in which hoM and heW did not differ. Our results support previous studies, which suggest cerebral differences between hoM and heM in regions, where sex differences have been reported, which are frequently proposed to underlie biological mechanisms. Thus, our results contribute to a better understanding of the neurobiology of sexual orientation.

## Introduction

The origin and development of a person's sexual orientation, and the feeling of being sexually attracted to a person of opposite, same or both sexes, is still a controversial topic. Research pointing to the fact that neurobiological processes are involved in the development of an individual's sexual orientation is emerging. Among the contributing factors it has been suggested that mechanism similar to

those influencing the female/male differentiation (sexual dimorphism) of the human brain during the fetal, neonatal and pubertal development could be involved. Such mechanisms include genetic information and/or effects of sex hormones. For example, sexual dimorphism of the brain, as well as sexual orientation has been linked to effects of testosterone, see [1–10] and references therein. While the literature on sex differences in the human brain is extensive, research on neurobiological characteristics of sexual orientation in humans is very limited.

### Previous neuroimaging studies

Some previous studies support the hypothesis of a neurobiological basis in the origin of sexual orientation, and have indicated that sexual orientation related structural and functional cerebral differences may exist. See [2, 8] for a comprehensive overview on the topic of sexual orientation related differences in the human brain. In brief, using magnetic resonance imaging (MRI) and positron emission tomography (PET) Savic et al. measured volumetric hemispheric asymmetry and functional connectivity of the amygdala, and found that hemispheric volumes of homosexual men and heterosexual women were symmetric, whereas heterosexual men and homosexual women showed a rightward cerebral asymmetry. In addition, the amygdala connections of the in homosexual men and heterosexual women were found to be more widespread from the left amygdala, whereas heterosexual men and homosexual women the functional connections were more widespread from the right amygdala [11]. Moreover, human pheromone-like compounds activated the anterior hypothalamus of heterosexual women and homosexual men in a similar way, but differently from the subjects of the same sex and opposite sexual orientation [12, 13]. Another MRI study revealed a more male-like structural pattern of grey matter in the perirhinal cortex of homosexual female participants [7]. Furthermore, Kranz et al. found that heterosexual females and homosexual males responded more to photographs of male faces, whereas homosexual females and heterosexual males responded more to photographs showing female faces [14]. It was also reported that compared to heM functional connectivity between a seed region in the left inferior occipital gyrus and the right cuneus was reduced in hoM, and the connectivity between this seed region and the right thalamus and cuneus correlated positively with Kinsey scores [15]. Moreover, during visually evoked sexual arousal different neural circuits were active in hoM and heM: heM showed activation in lingual, hippocampus and parahippocampal gyrus, whereas in hoM the angular gyrus, caudate and pallidum were activated. [16]. Although research pointing to the existence of cerebral differences related to sexual orientation is emerging, knowledge about neuroanatomical characteristics is still poor, and numerous questions about its origin and development still remain unanswered.

## Cortical thickness (Cth)

A metric increasingly used to study brain-behavior relationships in multiple clinical conditions and healthy controls, which is also associated with neurocognitive functions, is cortical thickness (Cth) [17–19]. The measure of Cth is related to the size, number and density of cells and dendrites in a cortical column [20], can serve as a proxy marker of the integrity of the cerebral cortex [21–23] and was shown to be related to brain metabolite concentrations, such as N-acetylaspartate [23]. The genetic coding of Cth seems also to be independent from the genetic coding of cortical surface area and volume [24, 25]. Intriguingly, Bramen et al. found that Cth was associated to circulating testosterone levels differently in adolescent boys (positively) and girls (negatively), and predominantly in regions high in androgen receptors, such as the medial occipital cortex [26]. Furthermore, the corresponding correlation seems to become inversed in the adulthood [27, 28] illustrating the complexity of the sex hormone interaction with sex, stage of development and region of the brain. Nevertheless, the reported preliminary observations are of interest for the research of sexual orientation, since testosterone is believed to have impact on sex differences in brain structure and some functions [29–31] implicating a possible link also to sexual orientation [2, 9, 32, 33]. In this respect it is also of note that sex differences in Cth have been reported, primarily in frontal, parietal and occipital areas of the brain [28, 34–39], albeit with some inconsistencies between the still limited reports in the literature. For example, using brain size normalized data Luders et al. demonstrated higher cortical thickness in females compared to males wide spread over all lobes, whereas when analyzing unscaled data females had thicker cortices in e.g. lateral superior pre- and postcentral regions, the occipital lobe and in left frontal gyrus. In addition, they showed that males had thicker cortices than females in a region of the left lateral temporal lobe, as also found by Lv et al [38]. Furthermore, Sowell et al. found thicker cortices in a region comprising the right inferior parietal and posterior temporal regions of females compared to males, when not correcting for differences in brain size, and males had thicker cortices than females in right anterior temporal and orbitofrontal regions [34]. In another study, Im et al. demonstrated greater cortical thickness in females in superior parietal and postcentral gyrus, but in contrast to other studies locally thicker cortices in men were not observed [37]. Presumably, some of these inconsistencies may stem from population based and/or methodological differences across studies, and taken together, further *in vivo* study is required to elucidate the relationship between sex and regional Cth.

## The present study

Findings in previous studies suggest that certain cerebral characteristics might differ between homosexual and heterosexual individuals, and that homosexual individuals may have some cerebral features, that are more similar to their opposite sex heterosexual counterpart. Moreover, sex differences in cortical thickness were reported, and testosterone effects are assumed to play a role in

sexual dimorphism of the brain, as well as being linked to the development of a certain sexual orientation. Thus, based on previous studies we hypothesized that sexual orientation related differences in regional Cth could be found, most likely in regions considered as sexually dimorphic (reviewed above) and/or regions high in androgen receptors, such as the medial occipital lobe.

To our knowledge, no previous studies investigated Cth differences in relation to sexual orientation. In pursuit of a better understanding of the origin and development of sexual orientation and to expand the knowledge about sexual orientation specific differences in the human brain, we investigated differences in regional cortical thickness between heterosexual men (heM) and homosexual men (hoM). To further explore whether potential differences are present in regions, where sex specific differences have been reported previously, we also compared both groups to heterosexual women (heW).

## Methods

### Participants

Sixty one healthy age-matched hoM (n=19), heM (n=21) and heW (n=21) were recruited from the local community. The Ethics Committee of the Karolinska Institutet Stockholm approved the study, and prior to study all participants signed informed consent forms. heM and hoM differed from heW in biological sex (male/female), whereas heM and hoM only differed in sexual orientation. Sexual orientation was assessed through the Kinsey hetero/homosexual self-identification scale (0: exclusively heterosexual, 6: exclusively homosexual) [40]. Individuals were considered as heterosexual when scoring between 0 and 1, and as homosexual when scoring between 5 and 6 on the Kinsey scale. Participants reported no history of psychiatric disorders, head trauma and head injury resulting in loss of consciousness for more than 10 minutes, HIV/AIDS, Hepatitis-C, chronic pain conditions, vision or hearing problems. In addition, all MRI scans were evaluated by a clinical radiologist to assure that the analyzed cohort show no brain pathology. To assure a balanced number of left and right handed participants in each group handedness was determined using the Edinburgh Handedness Inventory [41]. Participants' characteristics are described in more detail in the results section.

### MRI acquisition

3D T1-weighted SPGR (spoiled gradient echo; TE =3.1 ms, TR =7.9 ms, TI =450 ms, FOV =24 cm, matrix=240 × 240, 176 axial slices, flip angle =12 degree) were acquired with 1 mm<sup>3</sup> isotropic resolution using a 3-Tesla MRI medical scanner (Discovery 3T GE-MR750, General Electric, Milwaukee, Wisconsin) equipped with an 8-channel phased array receiving coil.

## Image processing

Cortical thickness (Cth) measures were obtained using the semi-automated subcortical volumetric segmentation and cortical surface reconstruction methods provided by Freesurfer v5.1. Methodological details of the individual processing steps can be found in [42–47]. In brief, the procedure includes intensity normalization, removal of non-brain tissue, segmentation of cortical gray, subcortical white, deep gray matter volumetric structures, triangular tessellation of the gray/white matter interface and the pial surface (white matter/cerebrospinal fluid boundary). Cortical thickness is calculated as the closest distance from the gray/white to the pial surface at each vertex on the reconstructed surfaces. All reconstructions were visually inspected and, where necessary, manual corrections were made by trained operators, including corrections of erroneous skull stripping, white matter, grey matter and subcortical segmentation using editing tools provided by Freesurfer. Freesurfer allows an automated parcellation of the cortical surfaces into 34 anatomical regions of interest (ROI) for each hemisphere, segmentation of subcortical ROIs (thalamus, caudate, putamen, hippocampus, amygdala) and cerebellum, see [45, 48] for technical details. For each ROI, Cth and subcortical volume measures were obtained from subjects' native space.

## Statistical analyses

Overall group differences in regional Cth and subcortical volumes were tested in separate univariate analyses of covariance (ANCOVA) using SPSS v20, with the MRI outcome measure as dependent variable, age as covariate and group (heM, hoM and heW) as fixed factor. Significant ANCOVA findings for group ( $p < 0.05$ ) were followed up by pairwise group comparisons (t-tests) to understand the nature of the main effect for the group factor. Since the tested outcome measures are correlated to each other, we corrected univariate and pairwise group analyses for multiple comparisons with an adjusted (or partial) Bonferroni method, details on the applied Dubey/Armitage-Parmaris procedure can be found in [49]. Alpha levels (0.05) were adjusted to  $p = 0.0024$  (cortical) and  $p = 0.0133$  (subcortical) using the average inter correlation coefficients among all investigated cortical ( $r = 0.28$ ) and subcortical ROIs ( $r = 0.46$ ) for the combined cohort. Those adjusted alpha levels represent the upper boundaries of p values, which can be considered as statistically significant after correction for multiple comparisons. Effect sizes for group mean differences were calculated via Cohen's d. We also tested for effects of years of education and total brain volume, respectively, by entering those variables simultaneous with age as covariates. Before final analysis, distributions of all investigated variables were tested for normality using the one-sample Kolmogorov-Smirnov test within each group separately and in the combined group. We also analyzed sexual orientation related differences in Cth on a vertex level. The methods and results of this secondary analysis are presented in [File S1](#).

## Results

### Demographic variables

Groups did not differ in age (heM:  $31.9 \pm 6.0$  years, heW:  $33.2 \pm 6.1$  years, hoM:  $33.5 \pm 6.1$  years), years of education (heM:  $15.9 \pm 2.0$ , heW:  $17.3 \pm 3.3$ , hoM:  $16.4 \pm 2.9$ ) or handedness scores (heM:  $74 \pm 26$ , heW:  $77 \pm 26$ , hoM:  $85 \pm 27$ ) and participants were primarily right handed. Two participants in the female group had slightly negative scores of  $-6$  and  $-20$ , respectively (mixed-handedness). Heterosexual individuals scored in average  $0.0 \pm 0.5$ , and homosexual individuals  $5.5 \pm 0.5$  on the Kinsey scale.

### Group comparisons of Cth and subcortical volumes

Univariate tests were significant for group differences in Cth in the left middle and superior temporal ROI, in the right inferior temporal, lateral orbitofrontal, pars triangularis, lingual, cuneus and pericalcarine ROI (all  $0.0001 < p < 0.041$ ). Group differences were also significant for subcortical volumes in amygdala, putamen, thalamus and cerebellum (all  $0.0001 < p < 0.004$ ). Results of pairwise group statistics of regions in which group differences were found are shown in [Table 1](#) and [2](#). MR measures (group means of Cth and subcortical volumes) of all investigated ROIs can be found in [Table S1](#) and [Table S2](#). In pairwise group comparisons of Cth in the left hemisphere, heW demonstrated significantly thinner cortices than hoM in the middle and superior temporal ROI. The same was observed comparing heW to heM, where the difference in the middle temporal ROI ( $p = 0.004$ ) can be considered as trend after Bonferroni adjustment. No differences were found between heM and hoM. In the right hemisphere, cortices of heW and hoM were thinner compared to heM in the lateral orbitofrontal, as well as in the lingual, pericalcarine and cuneus ROI, where the differences in right lateral orbitofrontal ( $p = 0.003$ ) and cuneus ( $p = 0.003$ ) are considered as strong trends after Bonferroni adjustments. In those ROIs no differences were found between heW and hoM. In addition, hoM showed thinner cortices than heM (and same trend compared to heW) in the right pars triangularis and inferior temporal ROI. Where significant differences or trends ( $p < 0.1$ ) were found effect sizes were moderate ( $0.5 - 0.79$ ) to strong ( $\geq 0.80$ ) [[50](#)].

heW had smaller volumes than both, heM and hoM, in left and right amygdala, putamen and cerebellum. However, in both hemispheres thalamus volumes of both hoM and heW were smaller than in heM, whereas thalamus volumes of hoM and heW did not differ. Controlling for years of education and brain volume, respectively, did not change the reported results of group differences in Cth. The same applies for group comparisons of subcortical volumes, with the exemption: when correcting for brain volume, groups were similar in amygdala, thalamus and putamen volumes, but hoM had still significantly smaller thalamus volumes than heM and heW (all  $p < 0.001$ ). Excluding the two ambidextrous female participants from the analysis did not change the results for observed group differences, neither in Cth nor subcortical volumes.

**Table 1.** Group differences in Cth.

| hemisphere | ROI                   | heM         | heW         | hoM         | ANCOVA, p | heM vs. heW, p (ES)      | heM vs. hoM, p (ES)      | heW vs. hoM, p (ES)  | pattern    |
|------------|-----------------------|-------------|-------------|-------------|-----------|--------------------------|--------------------------|----------------------|------------|
| left       | middle temporal       | 2.92 ± 0.13 | 2.81 ± 0.12 | 2.95 ± 0.13 | 0.002*    | <b>0.004 (0.91)</b>      | NS (0.20)                | <b>0.001* (1.13)</b> | heW < both |
|            | superior temporal     | 2.89 ± 0.12 | 2.79 ± 0.12 | 2.87 ± 0.12 | 0.022     | <b>0.009 (0.83)</b>      | NS (0.17)                | <b>0.038 (0.67)</b>  | heW < both |
| right      | inferior temporal     | 2.8 ± 0.16  | 2.75 ± 0.16 | 2.67 ± 0.16 | 0.041     | NS (0.33)                | <b>0.009 (0.86)</b>      | 0.096 (0.54)         | hoM < both |
|            | lateral orbitofrontal | 2.77 ± 0.12 | 2.65 ± 0.12 | 2.66 ± 0.12 | 0.004     | <b>0.003 (0.97)</b>      | <b>0.006 (0.92)</b>      | NS (0.06)            | heM > both |
|            | pars triangularis     | 2.51 ± 0.12 | 2.49 ± 0.12 | 2.38 ± 0.12 | 0.005     | NS (0.16)                | <b>0.002* (1.01)</b>     | <b>0.009 (0.85)</b>  | hoM < both |
|            | lingual               | 2.30 ± 0.12 | 2.07 ± 0.12 | 2.09 ± 0.12 | <0.001*   | <b>&lt;0.001* (1.91)</b> | <b>&lt;0.001* (1.76)</b> | NS (0.17)            | heM > both |
|            | cuneus                | 2.12 ± 0.15 | 1.99 ± 0.14 | 1.96 ± 0.14 | 0.001*    | <b>0.003 (0.95)</b>      | <b>0.001* (1.14)</b>     | NS (0.20)            | heM > both |
|            | pericalcarine         | 1.86 ± 0.19 | 1.65 ± 0.19 | 1.57 ± 0.19 | <0.001*   | <b>0.001* (1.08)</b>     | <b>&lt;0.001* (1.52)</b> | NS (0.44)            | heM > both |

Regional Cth (mean ± standard deviation, in mm, the values are adjusted for age), results (p-values) of pairwise group comparisons and corresponding effect sizes (ES). Significant p-values (p<0.05) are listed in bold and trends (p<0.1) in normal font. P-values surviving multiple comparison corrections (Bonferroni adjusted p=0.0024) are highlighted by \*. NS: not significant.

doi:10.1371/journal.pone.0114721.t001

## Discussion

To contribute to a better understanding of the neurobiology of sexual orientation, we investigated possible differences in regional cortical thickness (Cth) between heterosexual men (heM) and homosexual men (hoM). The group comparisons included heterosexual women (heW) in order to explore, whether (and if so, which of) the differences observed were present in regions, which indicate sex related differences.

Comparing heM and hoM, it was found that hoM had thinner cortices compared to heM in the right lateral orbitofrontal ROI, as well as in ROIs located in the right visual cortex (lingual, pericalcarine and cuneus). The same regions also showed thinner cortex in heW than in heM, whereas no differences were found between heW and hoM (see [Figure 1](#)). The additional sex related differences revealed in the left temporal and right orbitofrontal regions are in agreement with what was found in previous studies [[34](#), [36](#), [38](#), [39](#)]. Some previous studies of sex differences in Cth reported thicker cortices in women in a right temporoparietal region [[28](#), [34](#)] or a lateral superior pre- and postcentral region [[28](#), [36](#)], which was not found in this study. One possible reason for that could be that the ROI analysis used here is restricted to Cth measures averaged within a single predefined region. Consequently, potential differences localized in a relatively small ROI subregion or in a region comprised by small ROI subregions will not be detected by the presently used approach. In addition, when comparing male and female brains, which differ in size, group differences might be less

**Table 2.** Group differences in subcortical volumes.

| hemisphere | ROI         | heM          | heW          | hoM          | ANCOVA p | heM vs. heW, p (ES)    | heM vs. hoM, p (ES)    | heW vs. hoM, p (ES)    | pattern    |
|------------|-------------|--------------|--------------|--------------|----------|------------------------|------------------------|------------------------|------------|
| left       | amygdala    | 1973 ± 270   | 1679 ± 265   | 2019 ± 265   | <0.001*  | <b>0.001*</b> (1.10)   | NS (0.17)              | < <b>0.001*</b> (1.23) | heW < both |
|            | putamen     | 5262 ± 549   | 4623 ± 549   | 5228 ± 549   | <0.001*  | < <b>0.001*</b> (1.16) | NS (0.06)              | <b>0.001*</b> (1.10)   | heW < both |
|            | thalamus    | 7887 ± 604   | 7148 ± 604   | 6915 ± 601   | <0.001*  | < <b>0.001*</b> (1.22) | < <b>0.001*</b> (1.61) | NS (0.39)              | heM > both |
|            | hippocampus | 4312 ± 513   | 3923 ± 513   | 4021 ± 514   | 0.048    | <b>0.018</b> (0.76)    | 0.081 (0.57)           | NS (0.19)              | heM > both |
|            | cerebellum  | 74041 ± 5237 | 65144 ± 5219 | 73999 ± 5226 | <0.001*  | < <b>0.001*</b> (1.70) | NS (0.01)              | < <b>0.001*</b> (1.70) | heW < both |
| right      | amygdala    | 2102 ± 261   | 1875 ± 261   | 2130 ± 261   | 0.004*   | <b>0.007*</b> (0.87)   | NS (0.11)              | <b>0.003*</b> (0.98)   | heW < both |
|            | putamen     | 5166 ± 531   | 4464 ± 531   | 4895 ± 531   | <0.001*  | < <b>0.001*</b> (1.32) | NS (0.51)              | <b>0.013*</b> (0.81)   | heW < both |
|            | thalamus    | 7930 ± 604   | 7019 ± 604   | 6780 ± 601   | <0.001*  | < <b>0.001*</b> (1.51) | < <b>0.001*</b> (1.91) | NS (0.40)              | heM > both |
|            | hippocampus | 4337 ± 362   | 4114 ± 362   | 4357 ± 361   | 0.064    | <b>0.050</b> (0.62)    | NS (0.06)              | <b>0.037</b> (0.67)    | heW < both |
|            | cerebellum  | 76315 ± 5906 | 67068 ± 5884 | 75786 ± 5888 | <0.001*  | < <b>0.001*</b> (1.57) | NS (0.09)              | < <b>0.001*</b> (1.48) | heW < both |

Regional subcortical volumes (mean ± standard deviation, in mm<sup>3</sup>) adjusted for age. Results (p-values) of pairwise group comparisons and corresponding effect sizes (ES) are shown. Significant p-values (p<0.05) are listed in bold and trends (p<0.1) in normal font. P-values surviving multiple comparison corrections (Bonferroni adjusted p=0.0133) are highlighted with \*. NS: not significant. Results of secondary analysis correcting for brain volumes are described in the text.

doi:10.1371/journal.pone.0114721.t002



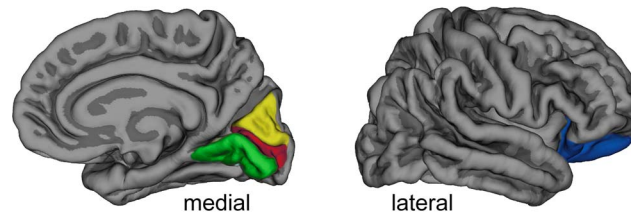

**Figure 1. Sex and sexual orientation related differences in Cth.** Freesurfer parcellated cortical ROIs of the right hemisphere in which a pattern of sex and sexual orientation related differences in Cth were found are highlighted (heM > both, hoM and heW; with heW = hoM). Yellow: cuneus, red: pericalcarine, green: lingual and blue: lateral orbitofrontal ROI.

doi:10.1371/journal.pone.0114721.g001

pronounced when not correcting for brain volumes [36]. However, by analyzing Cth measures obtained from the individual brain's native space the observed group differences have the advantage of not being influenced by scaling and normalization procedures, although this is at the cost of the spatial resolution of areas showing possible group differences. Another potential explanation for the described discrepancies compared with some previous studies is that sexual orientation of study participants, which could have influenced the results, was not considered in some of these previous studies. heM and hoM did not differ in brain volumes, and yet the sexual orientation related differences in Cth were similar to the here indicated sex related differences, which revealed strong effect sizes. These results could suggest that hoM differ from heM in regions, in which previous studies found sex related differences, and/or revealed high density of androgen receptors. More specifically, the present results indicate that hoM have different cortical thickness compared with heM in areas of the medial occipital lobe.

The underlying mechanisms leading to the observed structural differences related to sexual orientation are unknown, and cannot be derived from this study. One possibility is that biological processes frequently proposed to underlay sex differences, such as gene and sex hormone dependent mechanisms (e.g. testosterone effects) during pre- and postnatal development, may interact with the cortical architecture in visual areas resulting in different Cth in hoM compared to heM. For example, a recent study has shown that in visual areas (especially the right lingual gyrus), reported to be dense in androgen receptors, higher circulating testosterone levels were associated with thinner cortices in girls, but with thicker cortices in boys during adolescence [26]. The authors suggested that the positive correlations observed in boys could represent an effect of testosterone on cortical thickening by stimulating neurogenesis, or reflect a preservation of brain tissue by blocking apoptosis in visual areas, whereas in girls opposite effects may be operating. However, if or to what degree testosterone effects contribute to the cortical architecture in hoM, heM and heW is an open question, especially since associations between testosterone and Cth are complex and vary depending of brain region, sex and age [27]. Also, considering the fact that hoM had thinner cortices than both heM and heW in the right pars triangularis and the inferior temporal ROI, suggests that cerebral differences related to male homosexuality

might be present in regions, which are not necessarily considered as sexually dimorphic. Thus, more research is needed to investigate the structural underpinnings of sexual orientation.

It is also of interest that the thalamus volume was found to be smaller in hoM than in both heM and heW (see [Table 2](#)). Functional connectivity involving the right thalamus and the right cuneus were reported to be different between hoM and heM, and even showed correlations with Kinsey scale scores [[15](#)]. Furthermore, the thalamus is reported to be involved in sexual arousal and reward processes; During visually evoked sexual arousal both heM and hoM activated the thalamus, but heM, showed, in contrast to hoM, also activation in the lingual gyrus [[16](#)]. Hence, the here reported sexual orientation related structural differences in the visual cortex and thalamus support other studies suggesting sexual orientation related characteristics in visual perception and processing, and point to possible differences in other cognitive processes, in which visual areas are recruited (e.g. working memory, mental imagery and auditory attention [[51–57](#)]).

In summary, the present study is the first to indicate sexual orientation related differences in regional Cth. It indicates similar cortical structure in heW and hoM in early visual areas, which are different from heM. The results add to the existing literature on sex and sexual orientation related structural differences of the cerebral cortex, and, therefore, contribute to a better understanding of the neurobiology of sexual orientation. In addition, the data suggest that sexual orientation of study participants should be gathered in neuroimaging studies, since their characteristics may bias neuroimaging findings.

### Study limitations and Outlook

The present findings relate only to male homosexuality, and the generated data cannot be extrapolated to female homosexuality, which requires separate studies to be conducted. The data consisted of average thickness values obtained from relatively large cortical regions defined by the Desikan's atlas. Thus evaluations of group comparisons with higher regional resolution (e.g. vertex-wise analysis), as well as investigations of larger populations will most likely give more detailed and/or additional information about sexual orientation related cortical characteristics.

Furthermore, participants did not report any history of psychiatric disorders; however, we did not administer depression, mood or anxiety measures, which may be related to the morphological measures. Furthermore, differences in body mass index, diet and exercise, as well as smoking status may have influenced the findings. Also here, larger study samples are needed to identify the degree to which those factors affect our results. Although the present data do not provide information about the underlying mechanisms, and may not disentangle genetic, hormonal or other environmental processes, they open a direction for future investigations of the biology of sexual orientation.

## Supporting Information

**Table S1. Descriptive group data of cortical ROIs.** Cortical thickness obtained for heM, heW and hoM (mean  $\pm$  standard deviation) in all Freesurfer parcellated ROIs.

[doi:10.1371/journal.pone.0114721.s001](https://doi.org/10.1371/journal.pone.0114721.s001) (DOCX)

**Table S2. Descriptive group data of subcortical ROIs.** Subcortical volumes in all ROIs obtained for heM, heW and hoM (mean  $\pm$  standard deviation).

[doi:10.1371/journal.pone.0114721.s002](https://doi.org/10.1371/journal.pone.0114721.s002) (DOCX)

**File S1. Vertex-wise analysis of sexual orientation related differences in Cth.**

[doi:10.1371/journal.pone.0114721.s003](https://doi.org/10.1371/journal.pone.0114721.s003) (DOCX)

## Acknowledgments

The authors thank all participants who volunteered this study. Control data was collected in collaboration with Associate Professor Aleksander Perski and by funding from AFA security funds and FORTE. We also thank Alexander Berglund and Tom Perski for recruiting controls. We are also very grateful to Dr. Timothy Durazzo, Dr. Patrik Andersson and Dr. Jerome Goldstein for many fruitful discussions.

## Author Contributions

Conceived and designed the experiments: IS CA. Performed the experiments: CA EJ EA. Analyzed the data: CA. Wrote the paper: CA IS EJ EA. Recruitment of participants: CA EJ EA. Data processing: CA EJ EA.

## References

1. **Bao A-M, Swaab DF** (2011) Sexual differentiation of the human brain: Relation to gender identity, sexual orientation and neuropsychiatric disorders. *Frontiers in Neuroendocrinology* 32: 214–226.
2. **Savic I, Garcia-Falgueras A, Swaab DF** (2010) Sexual differentiation of the human brain in relation to gender identity and sexual orientation. *Prog Brain Res* 186: 41–62.
3. **Swaab DF, Garcia-Falgueras A** (2009) Sexual differentiation of the human brain in relation to gender identity and sexual orientation. *Functional neurology* 24: 17–28.
4. **Goldstein JM, Seidman LJ, Horton NJ, Makris N, Kennedy DN, et al.** (2001) Normal sexual dimorphism of the adult human brain assessed by in vivo magnetic resonance imaging. *Cerebral cortex* (New York, NY: 1991) 11: 490–497.
5. **Hines M** (2011) Gender development and the human brain. *Annual review of neuroscience* 34: 69–88.
6. **Manning JT, Robinson SJ** (2003) 2nd to 4th digit ratio and a universal mean for prenatal testosterone in homosexual men. *Medical hypotheses* 61: 303–306.
7. **Ponseti J, Siebner HR, Kloppel S, Wolff S, Granert O, et al.** (2007) Homosexual women have less grey matter in perirhinal cortex than heterosexual women. *PloS one* 2: e762.
8. **Rahman Q** (2005) The neurodevelopment of human sexual orientation. *Neuroscience and biobehavioral reviews* 29: 1057–1066.

9. **Lentini E, Kasahara M, Arver S, Savic I** (2013) Sex differences in the human brain and the impact of sex chromosomes and sex hormones. *Cerebral cortex* (New York, NY: 1991) 23: 2322–2336.
10. **Gooren LJJ, Kruijver FPM** (2002) Androgens and male behavior. *Molecular and Cellular Endocrinology* 198: 31–40.
11. **Savic I, Lindström P** (2008) PET and MRI show differences in cerebral asymmetry and functional connectivity between homo- and heterosexual subjects. *Proceedings of the National Academy of Sciences* 105: 9403–9408.
12. **Berglund H, Lindstrom P, Savic I** (2006) Brain response to putative pheromones in lesbian women. *Proceedings of the National Academy of Sciences of the United States of America* 103: 8269–8274.
13. **Savic I, Berglund H, Lindstrom P** (2005) Brain response to putative pheromones in homosexual men. *Proceedings of the National Academy of Sciences of the United States of America* 102: 7356–7361.
14. **Kranz F, Ishai A** (2006) Face perception is modulated by sexual preference. *Current biology: CB* 16: 63–68.
15. **Hu S, Xu D, Peterson B, Wang Q, He X, et al.** (2013) Association of cerebral networks in resting state with sexual preference of homosexual men: a study of regional homogeneity and functional connectivity. *PloS one* 8: e59426.
16. **Hu SH, Wei N, Wang QD, Yan LQ, Wei EQ, et al.** (2008) Patterns of brain activation during visually evoked sexual arousal differ between homosexual and heterosexual men. *AJNR American journal of neuroradiology* 29: 1890–1896.
17. **Choi YY, Shamosh NA, Cho SH, DeYoung CG, Lee MJ, et al.** (2008) Multiple bases of human intelligence revealed by cortical thickness and neural activation. *The Journal of neuroscience: the official journal of the Society for Neuroscience* 28: 10323–10329.
18. **Dickerson BC, Fenstermacher E, Salat DH, Wolk DA, Maguire RP, et al.** (2008) Detection of cortical thickness correlates of cognitive performance: Reliability across MRI scan sessions, scanners, and field strengths. *NeuroImage* 39: 10–18.
19. **Walhovd KB, Fjell AM, Dale AM, Fischl B, Quinn BT, et al.** (2006) Regional cortical thickness matters in recall after months more than minutes. *NeuroImage* 31: 1343–1351.
20. **Rakic P** (1988) Specification of cerebral cortical areas. *Science* (New York, NY) 241: 170–176.
21. **Dickerson BC, Wolk DA** (2012) MRI cortical thickness biomarker predicts AD-like CSF and cognitive decline in normal adults. *Neurology* 78: 84–90.
22. **Makris N, Biederman J, Valera EM, Bush G, Kaiser J, et al.** (2007) Cortical thinning of the attention and executive function networks in adults with attention-deficit/hyperactivity disorder. *Cerebral cortex* (New York, NY: 1991) 17: 1364–1375.
23. **Durazzo TC, Mon A, Gazdzinski S, Meyerhoff DJ** (2013) Chronic cigarette smoking in alcohol dependence: associations with cortical thickness and N-acetylaspartate levels in the extended brain reward system. *Addiction biology* 18: 379–391.
24. **Panizzon MS, Fennema-Notestine C, Eyler LT, Jernigan TL, Prom-Wormley E, et al.** (2009) Distinct genetic influences on cortical surface area and cortical thickness. *Cerebral cortex* (New York, NY: 1991) 19: 2728–2735.
25. **Winkler AM, Kochunov P, Blangero J, Almasy L, Zilles K, et al.** (2010) Cortical thickness or grey matter volume? The importance of selecting the phenotype for imaging genetics studies. *NeuroImage* 53: 1135–1146.
26. **Bramen JE, Hranilovich JA, Dahl RE, Chen J, Rosso C, et al.** (2012) Sex matters during adolescence: testosterone-related cortical thickness maturation differs between boys and girls. *PloS one* 7: e33850.
27. **Nguyen TV, McCracken J, Ducharme S, Botteron KN, Mahabir M, et al.** (2013) Testosterone-related cortical maturation across childhood and adolescence. *Cerebral cortex* (New York, NY: 1991) 23: 1424–1432.
28. **Savic I, Arver S** (2013) Sex Differences in Cortical Thickness and Their Possible Genetic and Sex Hormonal Underpinnings. *Cerebral cortex* (New York, NY: 1991).

29. **Hofer P, Lanzenberger R, Kasper S** (2013) Testosterone in the brain: neuroimaging findings and the potential role for neuropsychopharmacology. *European neuropsychopharmacology: the journal of the European College of Neuropsychopharmacology* 23: 79–88.
30. **Peper JS, van den Heuvel MP, Mandl RC, Hulshoff Pol HE, van Honk J** (2011) Sex steroids and connectivity in the human brain: a review of neuroimaging studies. *Psychoneuroendocrinology* 36: 1101–1113.
31. **Peper JS, Hulshoff Pol HE, Crone EA, van Honk J** (2011) Sex steroids and brain structure in pubertal boys and girls: a mini-review of neuroimaging studies. *Neuroscience* 191: 28–37.
32. **Garcia-Falgueras A, Swaab DF** (2010) Sexual hormones and the brain: an essential alliance for sexual identity and sexual orientation. *Endocrine development* 17: 22–35.
33. **Rahman Q, Wilson GD** (2003) Born gay? The psychobiology of human sexual orientation. *Personality and Individual Differences* 34: 1337–1382.
34. **Sowell ER, Peterson BS, Kan E, Woods RP, Yoshii J, et al.** (2007) Sex differences in cortical thickness mapped in 176 healthy individuals between 7 and 87 years of age. *Cerebral cortex (New York, NY: 1991)* 17: 1550–1560.
35. **Luders E, Narr KL, Thompson PM, Rex DE, Jancke L, et al.** (2006) Hemispheric asymmetries in cortical thickness. *Cerebral cortex (New York, NY: 1991)* 16: 1232–1238.
36. **Luders E, Narr KL, Thompson PM, Rex DE, Woods RP, et al.** (2006) Gender effects on cortical thickness and the influence of scaling. *Human brain mapping* 27: 314–324.
37. **Im K, Lee JM, Lee J, Shin YW, Kim IY, et al.** (2006) Gender difference analysis of cortical thickness in healthy young adults with surface-based methods. *NeuroImage* 31: 31–38.
38. **Lv B, Li J, He H, Li M, Zhao M, et al.** (2010) Gender consistency and difference in healthy adults revealed by cortical thickness. *NeuroImage* 53: 373–382.
39. **Tanabe J, York P, Krmpotich T, Miller D, Dalwani M, et al.** (2013) Insula and orbitofrontal cortical morphology in substance dependence is modulated by sex. *AJNR American journal of neuroradiology* 34: 1150–1156.
40. **Kinsey AC, Pomeroy WR, Martin C** (1948) *Sexual Behavior in the Human Male*. Philadelphia: Indiana University Press.
41. **Oldfield RC** (1971) The assessment and analysis of handedness: the Edinburgh inventory. *Neuropsychologia* 9: 97–113.
42. **Dale AM, Fischl B, Sereno MI** (1999) Cortical surface-based analysis. I. Segmentation and surface reconstruction. *NeuroImage* 9: 179–194.
43. **Fischl B, Sereno MI, Dale AM** (1999) Cortical surface-based analysis. II: Inflation, flattening, and a surface-based coordinate system. *NeuroImage* 9: 195–207.
44. **Fischl B, Dale AM** (2000) Measuring the thickness of the human cerebral cortex from magnetic resonance images. *Proceedings of the National Academy of Sciences of the United States of America* 97: 11050–11055.
45. **Fischl B, van der Kouwe A, Destrieux C, Halgren E, Segonne F, et al.** (2004) Automatically parcellating the human cerebral cortex. *Cerebral cortex (New York, NY: 1991)* 14: 11–22.
46. **Reuter M, Schmansky NJ, Rosas HD, Fischl B** (2012) Within-subject template estimation for unbiased longitudinal image analysis. *NeuroImage* 61: 1402–1418.
47. **Fischl B, Salat DH, van der Kouwe AJ, Makris N, Segonne F, et al.** (2004) Sequence-independent segmentation of magnetic resonance images. *NeuroImage* 23 Suppl 1: S69–84.
48. **Desikan RS, Segonne F, Fischl B, Quinn BT, Dickerson BC, et al.** (2006) An automated labeling system for subdividing the human cerebral cortex on MRI scans into gyral based regions of interest. *NeuroImage* 31: 968–980.
49. **Sankoh AJ, Huque MF, Dubey SD** (1997) Some comments on frequently used multiple endpoint adjustment methods in clinical trials. *Statistics in medicine* 16: 2529–2542.
50. **Olejnik S, Algina J** (2000) Measures of Effect Size for Comparative Studies: Applications, Interpretations, and Limitations. *Contemporary educational psychology* 25: 241–286.

51. **Cate AD, Herron TJ, Yund EW, Stecker GC, Rinne T, et al.** (2009) Auditory attention activates peripheral visual cortex. *PloS one* 4: e4645.
52. **Albers AM, Kok P, Toni I, Dijkerman HC, de Lange FP** (2013) Shared representations for working memory and mental imagery in early visual cortex. *Current biology: CB* 23: 1427–1431.
53. **Keogh R, Pearson J** (2011) Mental imagery and visual working memory. *PloS one* 6: e29221.
54. **Ventre-Dominey J, Bailly A, Lavenne F, Lebars D, Mollion H, et al.** (2005) Double dissociation in neural correlates of visual working memory: a PET study. *Brain research Cognitive brain research* 25: 747–759.
55. **Mellet E, Petit L, Mazoyer B, Denis M, Tzourio N** (1998) Reopening the mental imagery debate: lessons from functional anatomy. *NeuroImage* 8: 129–139.
56. **Michels L, Moazami-Goudarzi M, Jeanmonod D, Sarnthein J** (2008) EEG alpha distinguishes between cuneal and precuneal activation in working memory. *NeuroImage* 40: 1296–1310.
57. **Bluhm RL, Clark CR, McFarlane AC, Moores KA, Shaw ME, et al.** (2011) Default network connectivity during a working memory task. *Human brain mapping* 32: 1029–1035.
